# Supplementary material
Source: PubMed Central journal article supplement (PMC2785253)
Supplement: 0906268106_0906268106SI.pdf [file 0906268106_0906268106SI.pdf]

# Supporting Information

Steele et al. 10.1073/pnas.0906268106

## SI Methods

**MTT Toxicity Assay for Cell Viability.** Washed platelets ( $3 \times 10^8$  plts/ml) were added to a 96-well plate along with varying concentrations of recombinant Wnt3a or Wnt5a; 10  $\mu$ l of a 12 mM stock MTT (3-(4,5-dimethylthiazol-2-yl)-2,5-diphenyltetrazolium bromide) (Sigma) was added and the samples incubated for 4 h at 37 °C. The reaction was stopped upon addition of 50  $\mu$ l DMSO. Sample color was then quantified by reading the optical density (OD) at 540 nm using a multiwell scanning spectrophotometer (ELISA plate reader).

**Calcium Flux Measurement.** Platelet-rich plasma was loaded with the fluorescent dye Fura-2 AM (3  $\mu$ M, 45 min). Washed platelets were then prepared as described ( $1 \times 10^8$  plts/ml). Changes in fluorescence emission at 510 nm following agonist stimulation were measured in the presence of various concentrations of Wnt3a using excitation wavelengths of 340 nm and 380 nm. The ratio of emission at 340 and 380 nm excitation was calibrated in terms of  $[Ca^{2+}]_i$  using the method of Grynkiewicz et al. (1). The baseline-subtracted “area under the curve” (AUC) was calculated as a measure of the extent of intraplatelet  $Ca^{2+}$  signaling.

**RT-PCR.** RT-PCR was carried out on purified platelet RNA as previously described (2) using primers specific for *Fzd4*, *Fzd6* and *GAPDH* (see Table S1).

**Statistical Analysis.** Statistical analysis was performed using GraphPad Prism and Microsoft Excel software. All data are presented as mean value  $\pm$  SEM from 3 or more independent experiments. Statistical comparisons between different treatment groups were conducted using the Student’s Unpaired T-test. Differences in *p*-values of less than 0.05 were considered statistically significant.

## SI Results

**Wnt3a Inhibits Soluble Fibrinogen (Fb) Binding.** Using flow cytometry, we examined Wnt3a effects on soluble Fb binding (Fig. S2A). Platelets were activated with TRAP at concentrations of 1.5, 2.5 and 5  $\mu$ M in the absence (black bars) or presence of 32 nM (dark gray bars) or 50 nM (light gray bars) Wnt3a; 32 nM Wnt3a decreased Fb binding although this was only found to be significant at 1.5  $\mu$ M TRAP (*P* = 0.049). At 50 nM Wnt3a, however, Fb binding to all concentrations of TRAP-stimulated

platelets was significantly inhibited (1.5  $\mu$ M (*P* = 0.007), 2.5  $\mu$ M, (*P* = 0.034) and 5  $\mu$ M TRAP (*P* = 0.015)) (Fig. S2A).

**Wnt3a Induced No Significant Change in the Extent of  $Ca^{2+}$  Signaling.** The Wnt/ $Ca^{2+}$  pathway, known to influence cell adhesion and cell movements during embryonic gastrulation signals through transmembrane Fzd receptors resulting in the release of intracellular  $Ca^{2+}$ , and subsequent activation of calcium calmodulin-dependent kinase 2 (CamK2) and protein kinase C (PKC), which play important roles in platelet activation and cell adhesion (3, 4). To examine whether the inhibitory effects of Wnt3a on platelet function may be also mediated by this Wnt/ $Ca^{2+}$  pathway, we measured  $Ca^{2+}$  flux in platelets after Wnt3a stimulation. We found no significant change in the extent of  $Ca^{2+}$  signaling (Fig. S2F), at TRAP (SFLLRN) concentrations that were otherwise affected by Wnt3a (i.e., up to 5  $\mu$ M TRAP), suggesting that altered  $Ca^{2+}$  signaling is unlikely to mediate the effects of Wnt3a that we have described above. At much higher agonist concentrations (i.e., 10–30  $\mu$ M TRAP), there was a significant inhibition of the extent of TRAP-induced  $Ca^{2+}$  signaling, which may be secondary to reduced granule secretion. Furthermore, Wnt3a did not itself induce a  $Ca^{2+}$  transient suggesting that Wnt3a does not activate the Wnt/ $Ca^{2+}$  pathway in platelets to account for our observed effects.

**Wnt3a Inhibits Rho-Kinase Dependant TRAP-Induced Platelet Shape Change.** 1.5  $\mu$ M TRAP-induced platelet shape change (Fig. S2D and E) was measured by optical density in a Chronolog aggregometer. Combined inhibition of the early calcium-dependent and the sustained Rho-kinase-dependent pathways (Y27632 & BAPTA-AM) completely blocks shape change, indicating that the underlying signaling involved in TRAP-induced platelet shape change is similar to ADP-induced shape change (Fig. 5B and C). Y27632 had little effect on the maximum height unless the platelets were also treated with BAPTA; 50 nM Wnt3a alone has a similar (lack of) effect to Y27632, consistent with an inhibitory effect on the Rho/Rho kinase pathway. Furthermore, 50 nM Wnt3a alone had no significant effect on the extent to which shape change is sustained (Fig. S2E), possibly due to a more sustained  $Ca^{2+}$  signaling with TRAP when compared to ADP. However, when increases in  $[Ca^{2+}]_i$  were blocked with BAPTA, Wnt3a significantly reduced TRAP-induced platelet shape change (Fig. S2D and E).

1. Grynkiewicz G, Poenie M, Tsien RY (1985) A new generation of  $Ca^{2+}$  indicators with greatly improved fluorescence properties. *J Biol Chem* 260:3440–3450.
2. Macaulay IC, et al. (2007) Comparative gene expression profiling of in vitro differentiated megakaryocytes and erythroblasts identifies novel activatory and inhibitory platelet membrane proteins. *Blood* 109:3260–3269.
3. Kohn AD, Moon RT (2005) Wnt and calcium signaling: beta-catenin-independent pathways. *Cell Calcium* 38:439–446.

4. Sheldahl LC, et al. (2003) Dishevelled activates  $Ca^{2+}$  flux, PKC, and CamKII in vertebrate embryos. *J Cell Biol* 161:769–777.

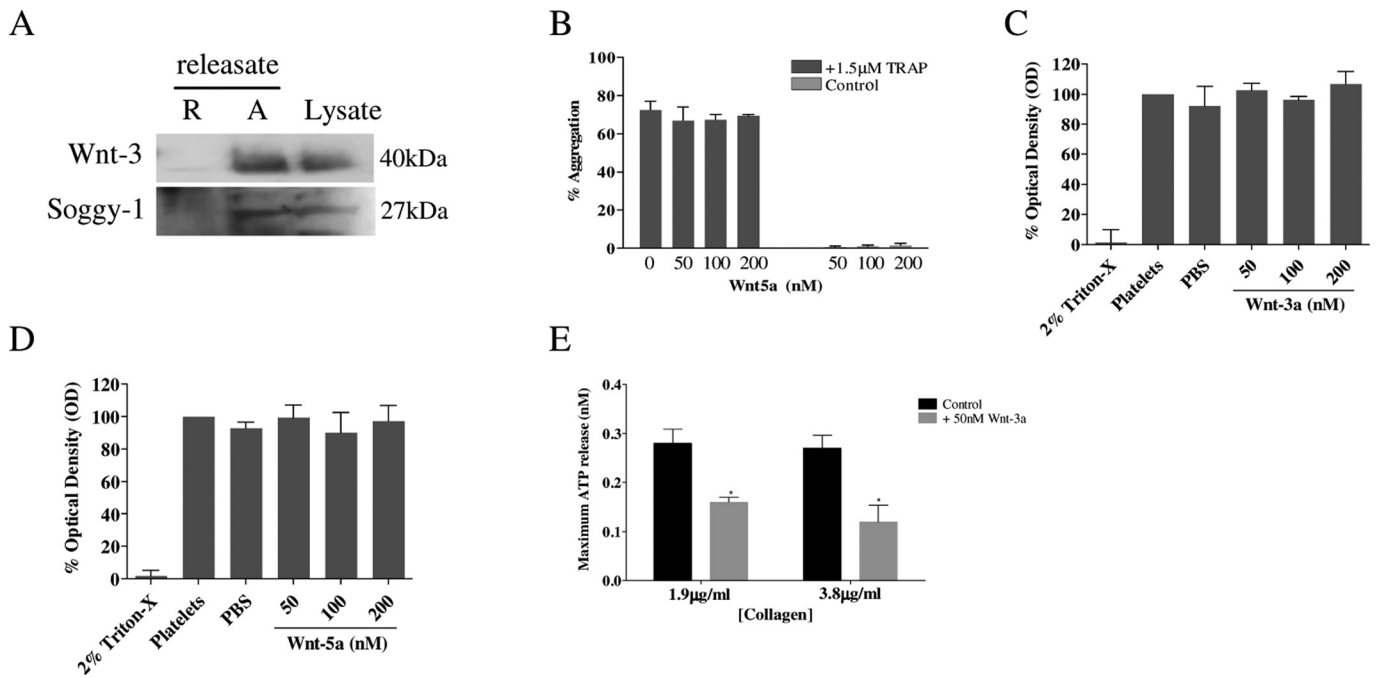

**Fig. S1.** (A) Resting (R) and 0.6U/ml Thrombin activated (A) platelet releasates were immunoblotted with antibodies against the Wnt agonist, Wnt-3 and the putative Wnt antagonist, Soggy-1. Resting whole platelet lysate (Lysate) was used to confirm the presence of these proteins in human platelets. (B) Wnt5a (up to [200 nM]) had no effect on control (resting platelets under constant stirring) (Right) or 1.5 μM TRAP-induced (Left) platelet aggregation. (C and D) MTT toxicity assays were carried out using washed platelets to ascertain that recombinant (C) Wnt3a and (D) Wnt5a proteins were not toxic to human platelets at concentrations of up to 200 nM. (E) Using a luminescent Chronolog-700 aggregometer, ATP secretion was measured in response to 1.9 μg/ml and 3.8 μg/ml collagen in the absence (black bars) and presence (gray bars) of 50 nM Wnt3a. All data are representative of 3 independent experiments and are presented as mean ± SEM (\*,  $P < 0.05$ ).



A

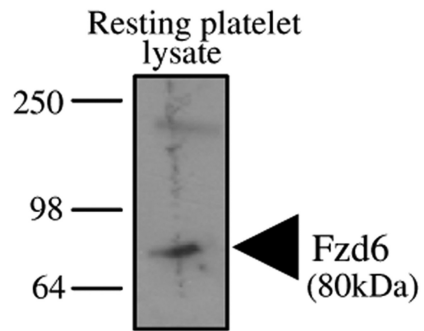

B

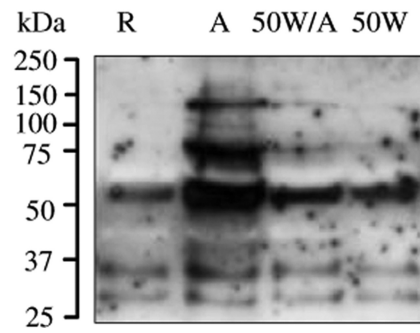

**Fig. S3.** (A) Detection of Fzd6 in platelet lysate by Western blotting. (B) Wnt signaling was found to reduce global tyrosine phosphotyrosine levels. Resting (R), 1.5  $\mu$ M TRAP activated (A), 50 nM Wnt3a + 1.5  $\mu$ M TRAP (50W/A) and 50 nM Wnt3a alone (50W) washed platelet lysates were blotted using the antiphosphotyrosine monoclonal 4G10 antibody. All data are representative of 3 independent experiments.

**Table S1. RT-PCR primers utilized for the detection of Fzd4 and Fzd6 transcripts**

| Transcript | Forward primer       | Reverse primer       | Product length (bp) |
|------------|----------------------|----------------------|---------------------|
| Fzd4       | GCCAATGTGCACAGAGAAGA | GGTTTTGTGAGGTAAGGGCA | 211                 |
| Fzd6       | TTGTTGGCATCTCTGCTGTC | CCATGGATTGGAAATGACC  | 222                 |
| GAPDH      | ACAGTCAGCCGCATCTTCTT | TGGAAGATGGTGATGGGATT | 288                 |
